# Supplementary material for: Transgenerational inheritance of susceptibility to diabetes-induced male subfertility
Source: PubMed Central journal article supplement (PMC5504044; doi:10.1038/s41598-017-05286-0), 2017-07-10
Supplement: 41598_2017_5286_MOESM1_ESM.pdf [file 41598_2017_5286_MOESM1_ESM.pdf]

# SUPPLEMENTARY INFORMATION

## **Transgenerational inheritance of susceptibility to diabetes-induced male subfertility**

Gabriela Pavlinkova<sup>1\*</sup>, Hasmik Margaryan<sup>2</sup>, Eva Zatecka<sup>2</sup>, Eliska Valaskova<sup>2</sup>, Fatima Elzeinova<sup>2</sup>, Alena Kubatova<sup>2</sup>, Romana Bohuslavova<sup>1</sup>, Jana Peknicova<sup>2</sup>

<sup>1</sup>Laboratory of Molecular Pathogenetics, Institute of Biotechnology CAS, BIOCEV, Czechia

<sup>2</sup>Laboratory of Reproductive Biology, Institute of Biotechnology CAS, BIOCEV, Czechia

\*Corresponding author: Gabriela Pavlinkova, [gpavlinkova@ibt.cas.cz](mailto:gpavlinkova@ibt.cas.cz)

# SUPPLEMENTARY FIGURE

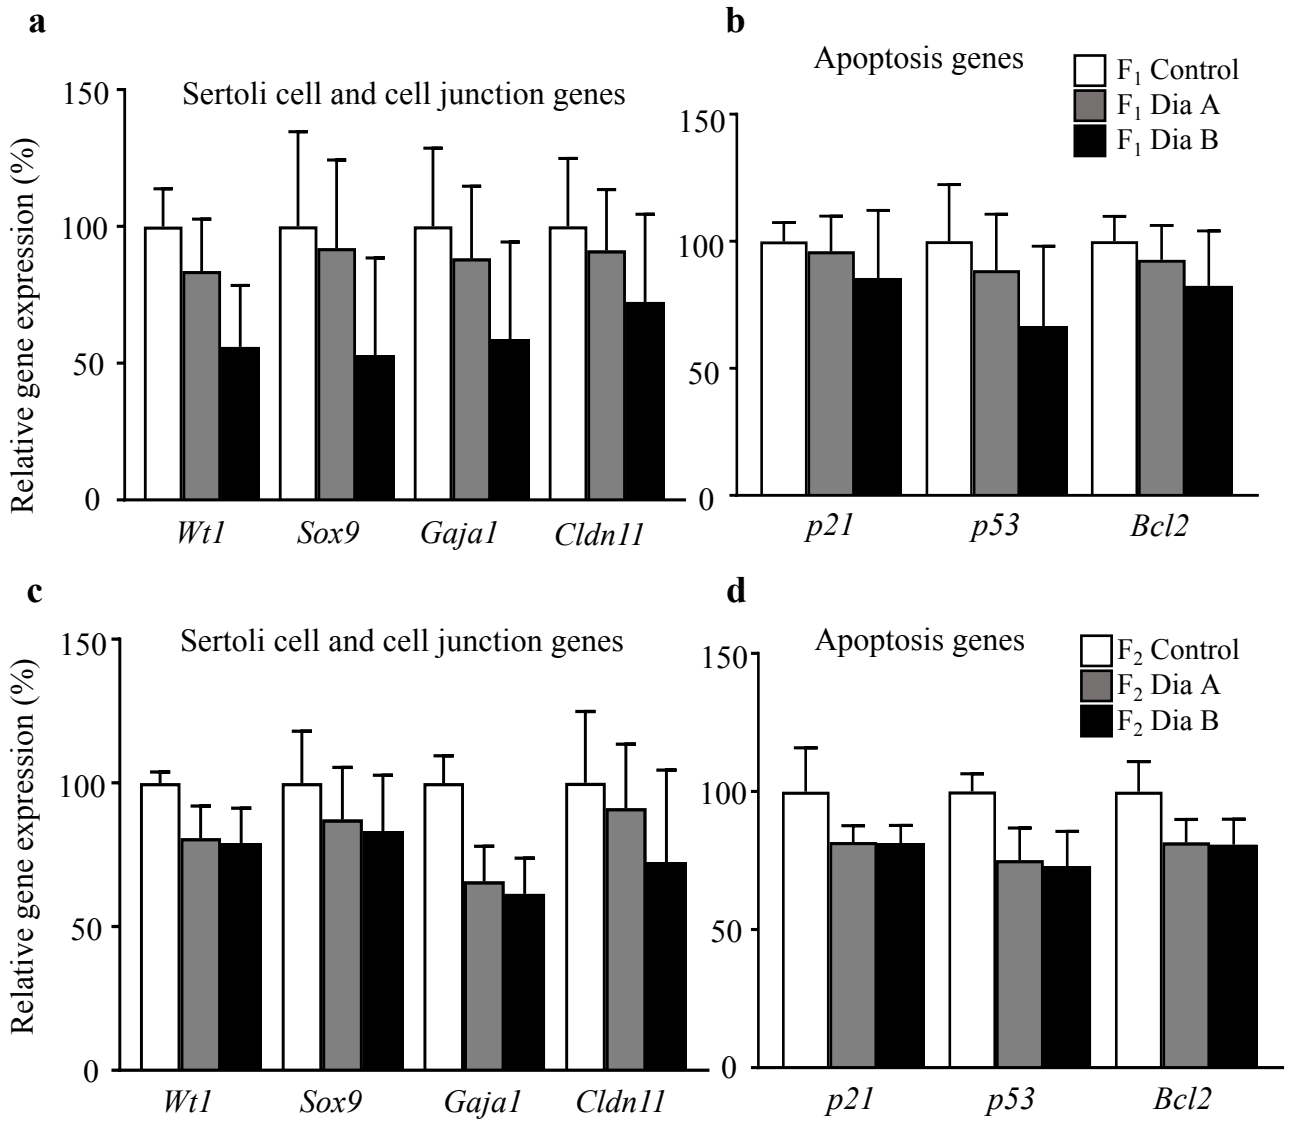

**Supplementary Figure 1. Transgenerational effects of diabetes on testicular gene expression of the F<sub>1</sub> and F<sub>2</sub> male generations.** The expression levels of genes encoding proteins associated with genes expressed in Sertoli cells: Wilms' tumour 1 (*Wt1*), SRY-box containing gene9 (*Sox9*), gap junction protein alpha 1 (*Gjal1*) and claudin 11 (*Cldn11*); and apoptotic markers: cyclin-dependent kinase inhibitor 1A (*p21*), tumor protein p53 (*p53*), and B cell leukemia/lymphoma 2 (*Bcl2*) are shown (**a**, **b**) for the F<sub>1</sub> males (controls n = 8; diabetic group A n=10; diabetic group B n=5) and (**c**, **d**) for the F<sub>2</sub> males (controls n = 6; diabetic group A n=12; diabetic group B n=11). The graph illustrates the relative expression of the selected genes. The control group represents 100% and the percentage in the experimental groups represents the ratio of gene expression between the treated groups and the control group. The values are means ± SEM.

## SUPPLEMENTARY DATA

**Supplementary Table S1.** List of antibodies with manufacturer reference number

| <u>Antibody</u>   | <u>Reference</u> | <u>Company</u>               |
|-------------------|------------------|------------------------------|
| mouse anti-VEGF-A | #sc-7269         | Santa Cruz Biotechnology     |
| rabbit anti-WT-1  | #CA1026          | Calbiochem                   |
| rabbit anti-pHH3  | #06-570          | Merck Millipore              |
| rabbit anti-CX43  | #C6219           | Sigma                        |
| mouse anti-SCP3   | #ab97672         | Abcam                        |
| Alexa Fluor® 488  | #115-545-146     | Jackson Immuno Research Labs |
| Alexa Fluor® 594  | #111-585-144     | Jackson Immuno Research Labs |

# SUPPLEMENTARY DATA

**Supplementary Table S2.** List of primer sequences

| Gene symbol   | Gene name                           | RefSeq ID      | Primer sequence |                                  |
|---------------|-------------------------------------|----------------|-----------------|----------------------------------|
| <i>Actb</i>   | Actin $\beta$                       | NM_007393.3    | F               | 5' -CGGTTCCGATGCCCTGAGGCTCTT- 3' |
|               |                                     |                | R               | 5' -CGTCACACTTCATGATGGAATTGA- 3' |
| <i>Bcl-2</i>  | B-cell leukemia/lymphoma            | NM_009741.3    | F               | 5' -CAGGGAGATGTCACCCCTGGTGG- 3'  |
|               |                                     |                | R               | 5' -AGGCATCCCAGCCTCCGTTATCC- 3'  |
| <i>Cldn11</i> | Claudin 11                          | NM_016674.4    | F               | 5' -GGCGACATTAGTGGCCACAGCA- 3'   |
|               |                                     |                | R               | 5' -GCAGCGGCCAGCCAGTAAA- 3'      |
| <i>Gjal</i>   | Gap junction alpha-1 protein        | NM_010288.3    | F               | 5' -TTTGGCGTGCCGGCTTCACTTT- 3'   |
|               |                                     |                | R               | 5' -CTCCGGCCGTGGAGTAGGCTT- 3'    |
| <i>Ppia</i>   | Peptidylprolyl isomerase A          | NC_000077.5    | F               | 5' -AGCTCTGAGCACTGGAGAGA- 3'     |
|               |                                     |                | R               | 5' -GCCAGGACCTGTATGCTTTA- 3'     |
| <i>Prm1</i>   | Protamine 1                         | NM_013637.4    | F               | 5' -ACAGGTTGGCTGGCTCGACC- 3'     |
|               |                                     |                | R               | 5' -CGGCAGCATCGGTATCTGGCC- 3'    |
| <i>Prm2</i>   | Protamine 2                         | NM_008933.1    | F               | 5' -CCAGGGGCCTGGACAAGACC- 3'     |
|               |                                     |                | R               | 5' -TCTGTGGTGGTGGTGGCCCC- 3'     |
| <i>p21</i>    | Cyclin-dependent kinase inhibitor 1 | NM_007669.4    | F               | 5' -CCGCCGCGGTGTCAGAGTCTA- 3'    |
|               |                                     |                | R               | 5' -CTGTGCGGAACAGGTCGGAC- 3'     |
| <i>p53</i>    | Tumor protein p53                   | NM_001127233.1 | F               | 5' -ATGGCTTCCACCTGGGCTTCCTG- 3'  |
|               |                                     |                | R               | 5' -CCACAACAGCACAGGGCACGT- 3'    |
| <i>Sox9</i>   | SRY-box containing gene 9           | NM_011448.4    | F               | 5' -GCTGGAAGTCGGAGAGCCGAGA- 3'   |
|               |                                     |                | R               | 5' -AGAGAACGAAACCGGGGCCAC- 3'    |
| <i>Sycp1</i>  | Synaptonemal Complex Protein 1      | NM_011516.2    | F               | 5' -GCCCATGCTCGAACAG GTTGC- 3'   |
|               |                                     |                | R               | 5' -ACAGTCTGCTCATTGGCTCTGAA- 3'  |
| <i>Sycp3</i>  | Synaptonemal Complex Protein 3      | NM_011517.2    | F               | 5' -GGACAGCGACAGCTCACCGG- 3'     |
|               |                                     |                | R               | 5' -GGTGGCTTCCCAGATTTCCCAGA- 3'  |
| <i>Tnp1</i>   | Transition protein 1                | NM_009407.2    | F               | 5' -CCGAGCTCCTCACAAG GGCGT- 3'   |
|               |                                     |                | R               | 5' -CAGGGCAGAGCTCATTGCCGC- 3'    |
| <i>Tnp2</i>   | Transition protein 2                | NM_013694.4    | F               | 5' -CCTGCAAGACCCAGCCACCG- 3'     |
|               |                                     |                | R               | 5' -GTTTCCGCCTCCTGACGGCC- 3'     |
| <i>Wt1</i>    | Wilms Tumor 1                       | NM_144783.2    | F               | 5' -GGCGTTTGAGGGGTCCGAC- 3'      |
|               |                                     |                | R               | 5' -AAAGTGGGCGGAGCACCGAC- 3'     |
